# Supplementary material
Source: PubMed Central journal article supplement (PMC6561084)
Supplement: NIHMS1002441-supplement-supp_table_A.pdf [file NIHMS1002441-supplement-supp_table_A.pdf]

## Supplementary File

**Online Table A:** Mean changes in metabolic, patient-reported, and medication use outcomes over course of study and differences between treatment groups

| Variable                     | Intervention (EOS Vs Baseline)<br>Mean [95%CI] | Usual care (EOS Vs Baseline)<br>Mean [95% CI] | Mean Difference between groups<br>(Intervention – Usual care) | 95% CI        | p-value |
|------------------------------|------------------------------------------------|-----------------------------------------------|---------------------------------------------------------------|---------------|---------|
| HbA1c (%)                    | -1.6[-1.8,-1.4]                                | -1.2[-1.4,-0.98]                              | -0.4                                                          | [-0.7, -0.19] | <0.001  |
| Systolic BP (mmHg)           | -18.3[-20.4,-16.2]                             | -12.9[-14.7,-11.0]                            | -5.4                                                          | [-8.2, -2.6]  | <0.001  |
| Diastolic BP (mmHg)          | -7.9[-9.0,-6.8]                                | -4.9[-6.2,-3.7]                               | -2.9                                                          | [-4.6, -1.3]  | <0.001  |
| LDLc (mg/dL)                 | -28.5[-31.8,-25.2]                             | -21.3[-25.1,-17.6]                            | -7.1                                                          | [-12.1, -2.1] | 0.005   |
| Weight (Kg)                  | 0.45[-0.04, 0.94]                              | 0.35 [-0.15,-0.86]                            | -0.09                                                         | [-0.81, 0.62] | 0.79    |
| BMI (Kg/m <sup>2</sup> )     | 0.21[0.01, 0.41]                               | 0.16[-0.04, 0.37]                             | -0.05                                                         | [-0.33,0.23]  | 0.73    |
| Waist circumference (cm)     | -0.23[-0.99, 0.54]                             | 0.34[-0.51, 1.2]                              | 0.56                                                          | [-0.58, 1.71] | 0.33    |
| EQ-5D score                  | 5.9[4.4,7.4]                                   | 4.1[2.7,5.5]                                  | 1.8                                                           | [-0.2, 3.9]   | <0.001  |
| DTSQ score                   | 2.1[1.59,2.69]                                 | 0.54[0.15,1.2]                                | 1.6                                                           | [0.7, 2.5]    | 0.08    |
| Creatinine                   | 0.087[ 0.041,0.133]                            | 0.014 [-0.064,0.092]                          | 0.07                                                          | [-0.01, 0.16] | 0.11    |
| Albumin to Creatinine ratio# | 0.49[0.41,0.59]                                | 0.49[0.41,0.59]                               | -                                                             | -             | 0.35    |
| Medications use*             |                                                |                                               |                                                               |               |         |
| OHA use (%)                  | 0.031[0.009,0.05]                              | -0.09[-0.05,-0.12]                            |                                                               |               | 0.0001  |
| BP-lowering drug use (%)     | 0.104[0.049,0.158]                             | -0.02[-0.08,-0.04]                            |                                                               |               | <0.0001 |
| Lipid-lowering drug use (%)  | 0.258[0.208,0.303]                             | 0.042[-0.02,0.10]                             |                                                               |               | <0.0001 |
| Insulin (%)                  | 0.153[0.094,0.211]                             | 0.06[0.001,0.12]                              |                                                               |               | <0.0001 |

Abbreviations: HbA1c (glycated haemoglobin), BP (Blood Pressure), LDLc (low density lipoprotein cholesterol), EQ-5D (European Quality of life – 5 Dimension), DTSQ (Diabetes Treatment Satisfaction Questionnaire), OHA (Oral hypoglycaemic agent), SE (standard error), CI (Confidence intervals), BMI: Body Mass Index

#Geometric mean presented for log-transformed Albumin to Creatinine ratio and P value for difference is calculated using Wilcoxon sign rank test

\*Medication use data is reported only for non-missing values

**Footnote:** Paired t-test used for within group difference in mean values of all variables (EOS – Baseline values)
