# Supplementary material
Source: PubMed Central journal article supplement (PMC6561084)
Supplement: NIHMS1002441-supplement-supp_table_B.pdf [file NIHMS1002441-supplement-supp_table_B.pdf]

## **Online Table B:**

**Sensitivity analysis using Inverse probability weighting (IPW) and Multiple Imputations (MI) to account for missing data**

|                                                                                                                                | Relative risk [95% CI] |                   |                  |
|--------------------------------------------------------------------------------------------------------------------------------|------------------------|-------------------|------------------|
|                                                                                                                                | GEE                    | IPW               | MI               |
| <b>Combined risk factor control (HbA1c &lt;7% &amp; either BP &lt;130/80 and/or LDLc &lt;100 [&lt;70 with history of CVD])</b> | 2.24 [1.71,2.92]       | 2.23 [1.71,2.90]  | 2.11 [1.64,2.72] |
| <b>HbA1c &lt;7%</b>                                                                                                            | 1.93 [1.52, 2.45]      | 1.91 [1.50, 2.43] | 1.89 [1.50,2.40] |
| <b>BP &lt;130/80 mmHg</b>                                                                                                      | 1.14 [1.04,1.26]       | 1.15 [1.03,1.26]  | 1.18 [1.01,1.30] |
| <b>LDLc &lt;100 mg/dl (&lt;70 with history of CVD)</b>                                                                         | 1.23 [1.13,1.34]       | 1.23 [1.13,1.34]  | 1.22 [1.11,1.34] |

*GEE-estimates obtained via using generalised estimating equation*

*IPW-Inverse probability weighting-estimates obtained by weighting for missing outcomes using GEE*

*MI-Multiple Imputation-estimates obtained by imputing the missing outcomes using fully conditional specification method and then using GEE*
