# Supplementary material
Source: PubMed Central journal article supplement (PMC6561084)
Supplement: NIHMS1002441-supplement-supp_table_C.pdf [file NIHMS1002441-supplement-supp_table_C.pdf]

**Online Table C:** Serious adverse events by treatment group

| No. | Event description                       | Incident events     |                         |                          | Total events† reported in trial |                         |                          |
|-----|-----------------------------------------|---------------------|-------------------------|--------------------------|---------------------------------|-------------------------|--------------------------|
|     |                                         | Total<br>(N = 1146) | Intervention<br>(n=575) | Usual<br>care<br>(n=571) | Total<br>(N =<br>1146)          | Intervention<br>(n=575) | Usual<br>care<br>(n=571) |
| 1   | Death                                   | 26                  | 12                      | 14                       |                                 |                         |                          |
| 2   | Transient Ischemic Attack               | 6                   | 5                       | 1                        |                                 |                         |                          |
| 3   | Ischemic stroke                         | 6                   | 2                       | 4                        |                                 |                         |                          |
| 4   | Intracerebral haemorrhage stroke        | 3                   | 3                       | 0                        |                                 |                         |                          |
| 5   | Stable angina                           | 4                   | 1                       | 3                        |                                 |                         |                          |
| 6   | Acute Coronary Syndrome                 | 19                  | 7                       | 12                       | 22                              | 10                      | 12                       |
| 7   | Arrhythmia                              | 3                   | 2                       | 1                        |                                 |                         |                          |
| 8   | Gastro Intestinal bleeding*             | 1                   | 0                       | 1                        |                                 |                         |                          |
| 9   | Diabetic retinopathy                    | 41                  | 20                      | 21                       | 60                              | 30                      | 30                       |
| 10  | Infection                               | 35                  | 24                      | 11                       | 40                              | 28                      | 12                       |
| 11  | Renal failure*                          | 3                   | 0                       | 3                        |                                 |                         |                          |
| 12  | Revascularization/surgical procedures   | 106                 | 55                      | 51                       | 107                             | 56                      | 51                       |
| 13  | Hospitalizations                        | 81                  | 41                      | 40                       | 135                             | 78                      | 57                       |
| 14  | Neuropathy                              | 164                 | 75                      | 89                       | 264                             | 124                     | 140                      |
| 15  | Mild hypoglycaemia                      | 154                 | 133                     | 21                       |                                 |                         |                          |
| 16  | Hypoglycaemia requiring hospitalization | 5                   | 4                       | 1                        |                                 |                         |                          |

\* No baseline data available for assessment of incident/recurrent events

† Total events include incident and recurrent events reported during the study; where no data are shown in the total events column, the total reported events were all new incident events
