# Supplementary material
Source: PubMed Central journal article supplement (PMC6561084)
Supplement: NIHMS1002441-supplement-supp_table_D.pdf [file NIHMS1002441-supplement-supp_table_D.pdf]

**Online Table D:** Site-wise Achievement of Primary outcomes by treatment group

| SITE-1                                                                                                  |              | Baseline     | 12m | 24m | EOS | Total | Relative risk<br>[95% CI] |                  |
|---------------------------------------------------------------------------------------------------------|--------------|--------------|-----|-----|-----|-------|---------------------------|------------------|
| Combined risk factor control (HbA1c <7% & either BP <130/80 and/or LDLc <100 [<70 with history of CVD]) | Intervention | Controlled   | 0   | 3   | 6   | 11    | 20                        | 4.71[1.45,15.22] |
|                                                                                                         |              | Uncontrolled | 75  | 63  | 40  | 53    | 231                       |                  |
|                                                                                                         |              | Total        | 75  | 66  | 46  | 64    | 251                       |                  |
|                                                                                                         | Usual Care   | Controlled   | 0   | 1   | 1   | 4     | 6                         |                  |
|                                                                                                         |              | Uncontrolled | 75  | 60  | 51  | 61    | 247                       |                  |
|                                                                                                         |              | Total        | 75  | 61  | 52  | 65    | 253                       |                  |
| HbA1c <7%                                                                                               | Intervention | Controlled   | 0   | 6   | 6   | 14    | 26                        | 1.64[0.74, 3.68] |
|                                                                                                         |              | Uncontrolled | 75  | 60  | 40  | 51    | 226                       |                  |
|                                                                                                         |              | Total        | 75  | 66  | 46  | 65    | 252                       |                  |
|                                                                                                         | Usual Care   | Controlled   | 0   | 6   | 3   | 6     | 15                        |                  |
|                                                                                                         |              | Uncontrolled | 75  | 55  | 49  | 61    | 240                       |                  |
|                                                                                                         |              | Total        | 75  | 61  | 52  | 67    | 255                       |                  |
| BP <130/80                                                                                              | Intervention | Controlled   | 16  | 24  | 14  | 19    | 73                        | 0.71[0.41, 1.24] |
|                                                                                                         |              | Uncontrolled | 59  | 42  | 32  | 46    | 179                       |                  |
|                                                                                                         |              | Total        | 75  | 66  | 46  | 65    | 252                       |                  |
|                                                                                                         | Usual Care   | Controlled   | 19  | 30  | 17  | 26    | 92                        |                  |
|                                                                                                         |              | Uncontrolled | 56  | 31  | 35  | 37    | 159                       |                  |
|                                                                                                         |              | Total        | 75  | 61  | 52  | 63    | 251                       |                  |
| LDLc <100 (<70 with history of CVD)                                                                     | Intervention | Controlled   | 9   | 20  | 23  | 17    | 69                        | 1.53[1.02, 2.29] |
|                                                                                                         |              | Uncontrolled | 66  | 46  | 23  | 47    | 182                       |                  |
|                                                                                                         |              | Total        | 75  | 66  | 46  | 64    | 251                       |                  |
|                                                                                                         | Usual Care   | Controlled   | 10  | 14  | 12  | 14    | 50                        |                  |
|                                                                                                         |              | Uncontrolled | 65  | 47  | 40  | 53    | 205                       |                  |
|                                                                                                         |              | Total        | 75  | 61  | 52  | 67    | 255                       |                  |
| SITE-2                                                                                                  |              | baseline     | 12m | 24m | EOS | Total | Relative risk<br>[95% CI] |                  |
| Combined risk factor control (HbA1c <7% & either BP <130/80 and/or LDLc <100 [<70 with history of CVD]) | Intervention | Controlled   | 0   | 9   | 4   | 7     | 20                        | 0.99[0.47, 2.07] |
|                                                                                                         |              | Uncontrolled | 81  | 60  | 37  | 57    | 235                       |                  |
|                                                                                                         |              | Total        | 81  | 69  | 41  | 64    | 255                       |                  |
|                                                                                                         | Usual Care   | Controlled   | 0   | 12  | 5   | 3     | 20                        |                  |
|                                                                                                         |              | Uncontrolled | 80  | 54  | 28  | 56    | 218                       |                  |
|                                                                                                         |              | Total        | 80  | 66  | 33  | 59    | 238                       |                  |
| HbA1c <7%                                                                                               | Intervention | Controlled   | 0   | 12  | 5   | 8     | 25                        | 0.98[0.49, 1.96] |
|                                                                                                         |              | Uncontrolled | 81  | 57  | 36  | 56    | 230                       |                  |
|                                                                                                         |              | Total        | 81  | 69  | 41  | 64    | 255                       |                  |
|                                                                                                         | Usual Care   | Controlled   | 0   | 14  | 5   | 5     | 24                        |                  |
|                                                                                                         |              | Uncontrolled | 80  | 52  | 28  | 54    | 214                       |                  |
|                                                                                                         |              | Total        | 80  | 66  | 33  | 59    | 238                       |                  |

|                                                                                                         |              | Total        | 80       | 66  | 33  | 59  | 238   |                        |
|---------------------------------------------------------------------------------------------------------|--------------|--------------|----------|-----|-----|-----|-------|------------------------|
| BP <130/80                                                                                              | Intervention | Controlled   | 13       | 25  | 24  | 43  | 105   | 1.59[0.92, 2.78]       |
|                                                                                                         |              | Uncontrolled | 68       | 44  | 17  | 21  | 150   |                        |
|                                                                                                         |              | Total        | 81       | 69  | 41  | 64  | 255   |                        |
|                                                                                                         | Usual Care   | Controlled   | 20       | 28  | 19  | 28  | 95    |                        |
|                                                                                                         |              | Uncontrolled | 60       | 38  | 14  | 31  | 143   |                        |
|                                                                                                         |              | Total        | 80       | 66  | 33  | 59  | 238   |                        |
| LDLc <100 (<70 with history of CVD)                                                                     | Intervention | Controlled   | 27       | 40  | 29  | 46  | 142   | 1.35[1.06, 1.73]       |
|                                                                                                         |              | Uncontrolled | 54       | 29  | 12  | 18  | 113   |                        |
|                                                                                                         |              | Total        | 81       | 69  | 41  | 64  | 255   |                        |
|                                                                                                         | Usual Care   | Controlled   | 20       | 32  | 14  | 24  | 90    |                        |
|                                                                                                         |              | Uncontrolled | 60       | 34  | 19  | 35  | 148   |                        |
|                                                                                                         |              | Total        | 80       | 66  | 33  | 59  | 238   |                        |
| SITE-3                                                                                                  |              |              | baseline | 12m | 24m | EOS | Total | Relative risk [95% CI] |
| Combined risk factor control (HbA1c <7% & either BP <130/80 and/or LDLc <100 [<70 with history of CVD]) | Intervention | Controlled   | 0        | 1   | 0   | 0   | 1     | NA                     |
|                                                                                                         |              | Uncontrolled | 5        | 4   | 4   | 5   | 18    |                        |
|                                                                                                         |              | Total        | 5        | 5   | 4   | 5   | 19    |                        |
|                                                                                                         | Usual Care   | Controlled   | 5        | 3   | 3   | 2   | 13    |                        |
|                                                                                                         |              | Uncontrolled | 5        | 3   | 3   | 2   | 13    |                        |
|                                                                                                         |              | Total        |          |     |     |     |       |                        |
| HbA1c <7%                                                                                               | Intervention | Controlled   | 0        | 1   | 1   | 0   | 2     | NA                     |
|                                                                                                         |              | Uncontrolled | 5        | 4   | 3   | 5   | 17    |                        |
|                                                                                                         |              | Total        | 5        | 5   | 4   | 5   | 19    |                        |
|                                                                                                         | Usual Care   | Controlled   | 5        | 3   | 3   | 2   | 13    |                        |
|                                                                                                         |              | Uncontrolled | 5        | 3   | 3   | 2   | 13    |                        |
|                                                                                                         |              | Total        |          |     |     |     |       |                        |
| BP <130/80                                                                                              | Intervention | Controlled   | 0        | 1   | 0   | 2   | 3     | NA                     |
|                                                                                                         |              | Uncontrolled | 5        | 4   | 4   | 3   | 16    |                        |
|                                                                                                         |              | Total        | 5        | 5   | 4   | 5   | 19    |                        |
|                                                                                                         | Usual Care   | Controlled   | 2        | 1   | 3   | 3   | 9     |                        |
|                                                                                                         |              | Uncontrolled | 3        | 2   | 0   | 0   | 5     |                        |
|                                                                                                         |              | Total        | 5        | 3   | 3   | 3   | 14    |                        |
| LDLc <100 (<70 with history of CVD)                                                                     | Intervention | Controlled   | 2        | 2   | 2   | 4   | 10    | NA                     |
|                                                                                                         |              | Uncontrolled | 3        | 3   | 2   | 1   | 9     |                        |
|                                                                                                         |              | Total        | 5        | 5   | 4   | 5   | 19    |                        |
|                                                                                                         | Usual Care   | Uncontrolled | 4        | 1   | 0   | 1   | 6     |                        |
|                                                                                                         |              | Controlled   | 1        | 2   | 3   | 1   | 7     |                        |
|                                                                                                         |              | Total        | 5        | 3   | 3   | 2   | 13    |                        |

| SITE-4                                                                                                  |              |              | baseline | 12m | 24m | EOS | Total | Relative risk<br>[95% CI] |
|---------------------------------------------------------------------------------------------------------|--------------|--------------|----------|-----|-----|-----|-------|---------------------------|
| Combined risk factor control (HbA1c <7% & either BP <130/80 and/or LDLc <100 [<70 with history of CVD]) | Intervention | Controlled   | 0        | 3   | 3   | 11  | 17    | 1.29[0.52, 3.2]           |
|                                                                                                         |              | Uncontrolled | 79       | 48  | 28  | 41  | 196   |                           |
|                                                                                                         |              | Total        | 79       | 51  | 31  | 52  | 213   |                           |
|                                                                                                         | Usual Care   | Controlled   | 0        | 3   | 1   | 14  | 18    |                           |
|                                                                                                         |              | Uncontrolled | 76       | 55  | 30  | 33  | 194   |                           |
|                                                                                                         |              | Total        | 76       | 58  | 31  | 47  | 212   |                           |
| HbA1c <7%                                                                                               | Intervention | Controlled   | 0        | 4   | 4   | 13  | 21    | 1.04[0.52, 2.12]          |
|                                                                                                         |              | Uncontrolled | 79       | 47  | 27  | 41  | 194   |                           |
|                                                                                                         |              | Total        | 79       | 51  | 31  | 54  | 215   |                           |
|                                                                                                         | Usual Care   | Controlled   | 0        | 6   | 2   | 14  | 22    |                           |
|                                                                                                         |              | Uncontrolled | 76       | 52  | 29  | 33  | 190   |                           |
|                                                                                                         |              | Total        | 76       | 58  | 31  | 47  | 212   |                           |
| BP <130/80                                                                                              | Intervention | Controlled   | 17       | 29  | 21  | 40  | 107   | 1.07[0.87, 1.31]          |
|                                                                                                         |              | Uncontrolled | 62       | 22  | 10  | 12  | 106   |                           |
|                                                                                                         |              | Total        | 79       | 51  | 31  | 52  | 213   |                           |
|                                                                                                         | Usual Care   | Controlled   | 16       | 34  | 15  | 37  | 102   |                           |
|                                                                                                         |              | Uncontrolled | 60       | 24  | 16  | 10  | 110   |                           |
|                                                                                                         |              | Total        | 76       | 58  | 31  | 47  | 212   |                           |
| LDLc <100 (<70 with history of CVD)                                                                     | Intervention | Controlled   | 23       | 24  | 16  | 31  | 94    | 1.08[0.83, 1.41]          |
|                                                                                                         |              | Uncontrolled | 56       | 27  | 15  | 21  | 119   |                           |
|                                                                                                         |              | Total        | 79       | 51  | 31  | 52  | 213   |                           |
|                                                                                                         | Usual Care   | Controlled   | 15       | 23  | 15  | 29  | 82    |                           |
|                                                                                                         |              | Uncontrolled | 61       | 35  | 16  | 18  | 130   |                           |
|                                                                                                         |              | Total        | 76       | 58  | 31  | 47  | 212   |                           |
| SITE-5                                                                                                  |              |              | baseline | 12m | 24m | EOS | Total | Relative risk<br>[95% CI] |
| Combined risk factor control (HbA1c <7% & either BP <130/80 and/or LDLc <100 [<70 with history of CVD]) | Intervention | Controlled   | 0        | 24  | 11  | 33  | 68    | 8.02[3.11, 20.62]         |
|                                                                                                         |              | Uncontrolled | 80       | 56  | 20  | 43  | 199   |                           |
|                                                                                                         |              | Total        | 80       | 80  | 31  | 76  | 267   |                           |
|                                                                                                         | Usual Care   | Controlled   | 0        | 2   | 3   | 3   | 8     |                           |
|                                                                                                         |              | Uncontrolled | 80       | 77  | 24  | 74  | 255   |                           |
|                                                                                                         |              | Total        | 80       | 79  | 27  | 77  | 263   |                           |
| HbA1c <7%                                                                                               | Intervention | Controlled   | 0        | 30  | 13  | 34  | 77    | 8.49[3.25, 22.19]         |
|                                                                                                         |              | Uncontrolled | 80       | 50  | 18  | 43  | 191   |                           |
|                                                                                                         |              | Total        | 80       | 80  | 31  | 77  | 268   |                           |
|                                                                                                         | Usual Care   | Controlled   | 0        | 3   | 3   | 3   | 9     |                           |
|                                                                                                         |              | Uncontrolled | 80       | 76  | 24  | 74  | 254   |                           |
|                                                                                                         |              | Total        | 80       | 79  | 27  | 77  | 263   |                           |

| BP <130/80                                                                                              | Intervention | Controlled   | 16        | 53        | 25        | 68        | 162        | 2.35[1.18, 4.70]*      |
|---------------------------------------------------------------------------------------------------------|--------------|--------------|-----------|-----------|-----------|-----------|------------|------------------------|
|                                                                                                         |              | Uncontrolled | 64        | 27        | 6         | 8         | 105        |                        |
|                                                                                                         |              | <b>Total</b> | <b>80</b> | <b>80</b> | <b>31</b> | <b>76</b> | <b>267</b> |                        |
|                                                                                                         | Usual Care   | Controlled   | 21        | 48        | 20        | 56        | 145        |                        |
|                                                                                                         |              | Uncontrolled | 59        | 31        | 7         | 21        | 118        |                        |
|                                                                                                         |              | <b>Total</b> | <b>80</b> | <b>79</b> | <b>27</b> | <b>77</b> | <b>263</b> |                        |
| LDLc <100 (<70 with history of CVD)                                                                     | Intervention | Controlled   | 17        | 42        | 24        | 59        | 142        | 1.45[0.79,2.67]*       |
|                                                                                                         |              | Uncontrolled | 63        | 38        | 7         | 18        | 126        |                        |
|                                                                                                         |              | <b>Total</b> | <b>80</b> | <b>80</b> | <b>31</b> | <b>77</b> | <b>268</b> |                        |
|                                                                                                         | Usual Care   | Controlled   | 12        | 32        | 19        | 54        | 117        |                        |
|                                                                                                         |              | Uncontrolled | 68        | 47        | 8         | 23        | 146        |                        |
|                                                                                                         |              | <b>Total</b> | <b>80</b> | <b>79</b> | <b>27</b> | <b>77</b> | <b>263</b> |                        |
| SITE-6                                                                                                  |              |              | baseline  | 12m       | 24m       | EOS       | Total      | Relative risk [95% CI] |
| Combined risk factor control (HbA1c <7% & either BP <130/80 and/or LDLc <100 [<70 with history of CVD]) | Intervention | Controlled   | 0         | 0         | 0         | 2         | 2          | NA                     |
|                                                                                                         |              | Uncontrolled | 40        | 29        | 18        | 29        | 116        |                        |
|                                                                                                         |              | <b>Total</b> | <b>40</b> | <b>29</b> | <b>18</b> | <b>31</b> | <b>118</b> |                        |
|                                                                                                         | Usual Care   | Controlled   | 0         | 1         | 2         | 6         | 9          |                        |
|                                                                                                         |              | Uncontrolled | 41        | 34        | 16        | 30        | 121        |                        |
|                                                                                                         |              | <b>Total</b> | <b>41</b> | <b>35</b> | <b>18</b> | <b>36</b> | <b>130</b> |                        |
| HbA1c <7%                                                                                               | Intervention | Controlled   | 0         | 1         | 0         | 3         | 4          | NA                     |
|                                                                                                         |              | Uncontrolled | 40        | 28        | 18        | 28        | 114        |                        |
|                                                                                                         |              | <b>Total</b> | <b>40</b> | <b>29</b> | <b>18</b> | <b>31</b> | <b>118</b> |                        |
|                                                                                                         | Usual Care   | Controlled   | 0         | 3         | 3         | 7         | 13         |                        |
|                                                                                                         |              | Uncontrolled | 41        | 32        | 15        | 29        | 117        |                        |
|                                                                                                         |              | <b>Total</b> | <b>41</b> | <b>35</b> | <b>18</b> | <b>36</b> | <b>130</b> |                        |
| BP <130/80                                                                                              | Intervention | Controlled   | 9         | 13        | 7         | 9         | 38         | 0.91[0.57, 1.46]       |
|                                                                                                         |              | Uncontrolled | 31        | 16        | 11        | 22        | 80         |                        |
|                                                                                                         |              | <b>Total</b> | <b>40</b> | <b>29</b> | <b>18</b> | <b>31</b> | <b>118</b> |                        |
|                                                                                                         | Usual Care   | Controlled   | 6         | 14        | 7         | 12        | 39         |                        |
|                                                                                                         |              | Uncontrolled | 35        | 21        | 12        | 24        | 92         |                        |
|                                                                                                         |              | <b>Total</b> | <b>41</b> | <b>35</b> | <b>19</b> | <b>36</b> | <b>131</b> |                        |
| LDLc <100 (<70 with history of CVD)                                                                     | Intervention | Controlled   | 12        | 18        | 8         | 14        | 52         | 1.05[0.74, 1.49]       |
|                                                                                                         |              | Uncontrolled | 28        | 11        | 10        | 17        | 66         |                        |
|                                                                                                         |              | <b>Total</b> | <b>40</b> | <b>29</b> | <b>18</b> | <b>31</b> | <b>118</b> |                        |
|                                                                                                         | Usual Care   | Controlled   | 12        | 13        | 9         | 18        | 52         |                        |
|                                                                                                         |              | Uncontrolled | 29        | 22        | 11        | 18        | 80         |                        |
|                                                                                                         |              | <b>Total</b> | <b>41</b> | <b>35</b> | <b>20</b> | <b>36</b> | <b>132</b> |                        |
| SITE-7                                                                                                  |              |              | baseline  | 12m       | 24m       | EOS       | Total      | Relative risk [95% CI] |

|                                                                                                         |              |              |    |    |    |    |     |                   |
|---------------------------------------------------------------------------------------------------------|--------------|--------------|----|----|----|----|-----|-------------------|
| Combined risk factor control (HbA1c <7% & either BP <130/80 and/or LDLc <100 [<70 with history of CVD]) | Intervention | Controlled   | 0  | 9  | 3  | 10 | 22  | 3.49[1.23, 9.92]  |
|                                                                                                         |              | Uncontrolled | 80 | 59 | 23 | 53 | 215 |                   |
|                                                                                                         |              | Total        | 80 | 68 | 26 | 63 | 237 |                   |
|                                                                                                         | Usual Care   | Controlled   | 0  | 2  | 1  | 4  | 7   |                   |
|                                                                                                         |              | Uncontrolled | 80 | 75 | 30 | 61 | 246 |                   |
|                                                                                                         |              | Total        | 80 | 77 | 31 | 65 | 253 |                   |
| HbA1c <7%                                                                                               | Intervention | Controlled   | 0  | 9  | 5  | 11 | 25  | 2.98[1.19, 7.44]  |
|                                                                                                         |              | Uncontrolled | 80 | 59 | 21 | 54 | 214 |                   |
|                                                                                                         |              | Total        | 80 | 68 | 26 | 65 | 239 |                   |
|                                                                                                         | Usual Care   | Controlled   | 0  | 3  | 2  | 4  | 9   |                   |
|                                                                                                         |              | Uncontrolled | 80 | 74 | 29 | 61 | 244 |                   |
|                                                                                                         |              | Total        | 80 | 77 | 31 | 65 | 253 |                   |
| BP <130/80                                                                                              | Intervention | Controlled   | 6  | 46 | 16 | 43 | 111 | 2.83[1.58, 5.08]* |
|                                                                                                         |              | Uncontrolled | 74 | 25 | 10 | 21 | 130 |                   |
|                                                                                                         |              | Total        | 80 | 71 | 26 | 64 | 241 |                   |
|                                                                                                         | Usual Care   | Controlled   | 7  | 29 | 13 | 26 | 75  |                   |
|                                                                                                         |              | Uncontrolled | 73 | 48 | 18 | 39 | 178 |                   |
|                                                                                                         |              | Total        | 80 | 77 | 31 | 65 | 253 |                   |
| LDLc <100 (<70 with history of CVD)                                                                     | Intervention | Controlled   | 21 | 34 | 13 | 40 | 108 | 1.72[0.95,3.12]*  |
|                                                                                                         |              | Uncontrolled | 59 | 34 | 13 | 25 | 131 |                   |
|                                                                                                         |              | Total        | 80 | 68 | 26 | 65 | 239 |                   |
|                                                                                                         | Usual Care   | Controlled   | 26 | 27 | 12 | 40 | 105 |                   |
|                                                                                                         |              | Uncontrolled | 54 | 50 | 19 | 25 | 148 |                   |
|                                                                                                         |              | Total        | 80 | 77 | 31 | 65 | 253 |                   |

| SITE-8                                                                                                  |              |              | baseline | 12m | 24m | EOS | Total | Relative risk [95% CI] |
|---------------------------------------------------------------------------------------------------------|--------------|--------------|----------|-----|-----|-----|-------|------------------------|
| Combined risk factor control (HbA1c <7% & either BP <130/80 and/or LDLc <100 [<70 with history of CVD]) | Intervention | Controlled   | 0        | 12  | 8   | 20  | 40    | 2.11[1.12, 3.97]       |
|                                                                                                         |              | Uncontrolled | 70       | 50  | 19  | 39  | 178   |                        |
|                                                                                                         |              | Total        | 70       | 62  | 27  | 59  | 218   |                        |
|                                                                                                         | Usual Care   | Controlled   | 0        | 8   | 3   | 6   | 17    |                        |
|                                                                                                         |              | Uncontrolled | 70       | 53  | 27  | 52  | 202   |                        |
|                                                                                                         |              | Total        | 70       | 61  | 30  | 58  | 219   |                        |
| HbA1c <7%                                                                                               | Intervention | Controlled   | 0        | 13  | 10  | 23  | 46    | 1.77[1.02, 3.07]       |
|                                                                                                         |              | Uncontrolled | 70       | 49  | 17  | 36  | 172   |                        |
|                                                                                                         |              | Total        | 70       | 62  | 27  | 59  | 218   |                        |
|                                                                                                         | Usual Care   | Controlled   | 0        | 9   | 6   | 9   | 24    |                        |
|                                                                                                         |              | Uncontrolled | 70       | 52  | 24  | 50  | 196   |                        |
|                                                                                                         |              | Total        | 70       | 61  | 30  | 59  | 220   |                        |
| BP <130/80                                                                                              | Intervention | Controlled   | 3        | 15  | 9   | 20  | 47    | 2.30[1.15, 4.63]*      |
|                                                                                                         | Uncontrolled | 67           | 47       | 18  | 39  | 171 |       |                        |

|                   |                     |    |    |    |    |     |  |
|-------------------|---------------------|----|----|----|----|-----|--|
|                   | <b>Total</b>        | 70 | 62 | 27 | 59 | 218 |  |
| <b>Usual Care</b> | <b>Controlled</b>   | 9  | 14 | 5  | 14 | 42  |  |
|                   | <b>Uncontrolled</b> | 61 | 47 | 25 | 45 | 178 |  |
|                   | <b>Total</b>        | 70 | 61 | 30 | 59 | 220 |  |

|                                                  |                     |                     |    |    |    |    |     |                  |
|--------------------------------------------------|---------------------|---------------------|----|----|----|----|-----|------------------|
| <b>LDLc &lt;100 (&lt;70 with history of CVD)</b> | <b>Intervention</b> | <b>Controlled</b>   | 30 | 43 | 24 | 42 | 139 | 2.05[1.07,3.93]* |
|                                                  |                     | <b>Uncontrolled</b> | 40 | 19 | 3  | 17 | 79  |                  |
|                                                  |                     | <b>Total</b>        | 70 | 62 | 27 | 59 | 218 |                  |
|                                                  | <b>Usual Care</b>   | <b>Controlled</b>   | 27 | 39 | 14 | 38 | 118 |                  |
|                                                  |                     | <b>Uncontrolled</b> | 43 | 22 | 16 | 21 | 102 |                  |
|                                                  |                     | <b>Total</b>        | 70 | 61 | 30 | 59 | 220 |                  |

| <b>SITE-9</b>                                                                                                                  |                     |                     | <b>baseline</b> | <b>12m</b> | <b>24m</b> | <b>EOS</b> | <b>Total</b> | <b>Relative risk [95% CI]</b> |
|--------------------------------------------------------------------------------------------------------------------------------|---------------------|---------------------|-----------------|------------|------------|------------|--------------|-------------------------------|
| <b>Combined risk factor control (HbA1c &lt;7% &amp; either BP &lt;130/80 and/or LDLc &lt;100 [&lt;70 with history of CVD])</b> | <b>Intervention</b> | <b>Controlled</b>   | 0               | 9          | 3          | 1          | 13           | 2.97[1.06,8.29]**             |
|                                                                                                                                |                     | <b>Uncontrolled</b> | 32              | 23         | 13         | 31         | 99           |                               |
|                                                                                                                                |                     | <b>Total</b>        | 32              | 32         | 16         | 32         | 112          |                               |
|                                                                                                                                | <b>Usual Care</b>   | <b>Controlled</b>   | 0               | 2          | 0          | 2          | 4            |                               |
|                                                                                                                                |                     | <b>Uncontrolled</b> | 31              | 28         | 11         | 27         | 97           |                               |
|                                                                                                                                |                     | <b>Total</b>        | 31              | 30         | 11         | 29         | 101          |                               |

|                     |                     |                     |    |    |    |    |     |                   |
|---------------------|---------------------|---------------------|----|----|----|----|-----|-------------------|
| <b>HbA1c &lt;7%</b> | <b>Intervention</b> | <b>Controlled</b>   | 0  | 10 | 3  | 3  | 16  | 2.14[0.94,4.89]** |
|                     |                     | <b>Uncontrolled</b> | 32 | 22 | 13 | 29 | 96  |                   |
|                     |                     | <b>Total</b>        | 32 | 32 | 16 | 32 | 112 |                   |
|                     | <b>Usual Care</b>   | <b>Controlled</b>   | 0  | 3  | 0  | 4  | 7   |                   |
|                     |                     | <b>Uncontrolled</b> | 31 | 28 | 11 | 25 | 95  |                   |
|                     |                     | <b>Total</b>        | 31 | 31 | 11 | 29 | 102 |                   |

|                      |                     |                     |    |    |    |    |     |                  |
|----------------------|---------------------|---------------------|----|----|----|----|-----|------------------|
| <b>BP &lt;130/80</b> | <b>Intervention</b> | <b>Controlled</b>   | 5  | 8  | 5  | 15 | 33  | 2.37[1.06, 5.29] |
|                      |                     | <b>Uncontrolled</b> | 27 | 24 | 11 | 17 | 79  |                  |
|                      |                     | <b>Total</b>        | 32 | 32 | 16 | 32 | 112 |                  |
|                      | <b>Usual Care</b>   | <b>Controlled</b>   | 5  | 3  | 1  | 7  | 16  |                  |
|                      |                     | <b>Uncontrolled</b> | 26 | 28 | 10 | 22 | 86  |                  |
|                      |                     | <b>Total</b>        | 31 | 31 | 11 | 29 | 102 |                  |

|                                                  |                     |                     |    |    |    |    |     |                  |
|--------------------------------------------------|---------------------|---------------------|----|----|----|----|-----|------------------|
| <b>LDLc &lt;100 (&lt;70 with history of CVD)</b> | <b>Intervention</b> | <b>Controlled</b>   | 9  | 19 | 11 | 22 | 61  | 1.59[0.98, 2.58] |
|                                                  |                     | <b>Uncontrolled</b> | 23 | 13 | 5  | 10 | 51  |                  |
|                                                  |                     | <b>Total</b>        | 32 | 32 | 16 | 32 | 112 |                  |
|                                                  | <b>Usual Care</b>   | <b>Controlled</b>   | 8  | 14 | 3  | 10 | 35  |                  |
|                                                  |                     | <b>Uncontrolled</b> | 23 | 16 | 8  | 19 | 66  |                  |
|                                                  |                     | <b>Total</b>        | 31 | 30 | 11 | 29 | 101 |                  |

| <b>SITE-10</b>                                          |                     |                     | <b>baseline</b> | <b>12m</b> | <b>24m</b> | <b>EOS</b> | <b>Total</b> | <b>Relative risk [95% CI]</b> |
|---------------------------------------------------------|---------------------|---------------------|-----------------|------------|------------|------------|--------------|-------------------------------|
| <b>Combined risk factor control (HbA1c &lt;7% &amp;</b> | <b>Intervention</b> | <b>Controlled</b>   | 0               | 8          | 5          | 6          | 19           | 2.32[0.98, 5.50]              |
|                                                         |                     | <b>Uncontrolled</b> | 33              | 24         | 2          | 25         | 84           |                               |

|                                                                                       |                     |                     |    |    |   |    |     |                  |
|---------------------------------------------------------------------------------------|---------------------|---------------------|----|----|---|----|-----|------------------|
| <b>either BP &lt;130/80 and/or<br/>LDLc &lt;100 (&lt;70 with<br/>history of CVD))</b> | <b>Total</b>        |                     | 33 | 32 | 7 | 31 | 103 |                  |
|                                                                                       | <b>Usual Care</b>   | <b>Controlled</b>   | 0  | 6  | 2 | 2  | 10  |                  |
|                                                                                       |                     | <b>Uncontrolled</b> | 33 | 27 | 6 | 31 | 97  |                  |
|                                                                                       | <b>Total</b>        |                     | 33 | 33 | 8 | 33 | 107 |                  |
| <b>HbA1c &lt;7%</b>                                                                   | <b>Intervention</b> | <b>Controlled</b>   | 0  | 10 | 5 | 7  | 22  | 2.27[1.07, 4.84] |
|                                                                                       |                     | <b>Uncontrolled</b> | 33 | 22 | 2 | 24 | 81  |                  |
|                                                                                       | <b>Total</b>        |                     | 33 | 32 | 7 | 31 | 103 |                  |
|                                                                                       | <b>Usual Care</b>   | <b>Controlled</b>   | 0  | 6  | 2 | 3  | 11  |                  |
|                                                                                       |                     | <b>Uncontrolled</b> | 33 | 27 | 6 | 30 | 96  |                  |
|                                                                                       | <b>Total</b>        |                     | 33 | 33 | 8 | 33 | 107 |                  |
| <b>BP &lt;130/80</b>                                                                  | <b>Intervention</b> | <b>Controlled</b>   | 8  | 16 | 5 | 20 | 49  | 1.11[0.92, 1.35] |
|                                                                                       |                     | <b>Uncontrolled</b> | 25 | 16 | 2 | 11 | 54  |                  |
|                                                                                       | <b>Total</b>        |                     | 33 | 32 | 7 | 31 | 103 |                  |
|                                                                                       | <b>Usual Care</b>   | <b>Controlled</b>   | 11 | 18 | 5 | 13 | 47  |                  |
|                                                                                       |                     | <b>Uncontrolled</b> | 22 | 15 | 3 | 20 | 60  |                  |
|                                                                                       | <b>Total</b>        |                     | 33 | 33 | 8 | 33 | 107 |                  |
| <b>LDLc &lt;100 (&lt;70 with<br/>history of CVD)</b>                                  | <b>Intervention</b> | <b>Controlled</b>   | 5  | 20 | 6 | 22 | 53  | 2.21[0.81,6.08]  |
|                                                                                       |                     | <b>Uncontrolled</b> | 28 | 12 | 1 | 9  | 50  |                  |
|                                                                                       | <b>Total</b>        |                     | 33 | 32 | 7 | 31 | 103 |                  |
|                                                                                       | <b>Usual Care</b>   | <b>Controlled</b>   | 7  | 19 | 4 | 20 | 50  |                  |
|                                                                                       |                     | <b>Uncontrolled</b> | 26 | 14 | 4 | 13 | 57  |                  |
|                                                                                       | <b>Total</b>        |                     | 33 | 33 | 8 | 33 | 107 |                  |

Overall relative risk were obtained via log binomial models using generalised estimating, (where the log - binomial model did not converge we have used logistic model for the estimates and have reported odds ratio [95% CI]). Estimates combine all non-missing values collected at baseline, months 12, 24, and end-of-study. Model terms include treatment, time, treatment\*time interaction, baseline value and site.

\* shows odds ratio[95% CI]

\*\* shows the relative risk for model including-baseline value, treatment and time as the estimates were not estimable with interaction term

NA, Not Applicable(could not obtain estimates)

Abbreviations: BP: Blood pressure (systolic/diastolic) in mmHg, HbA1c (glycated haemoglobin) in %, LDLc (low density lipoprotein cholesterol) in mg/dl, CVD (cardiovascular disease), CI (confidence intervals)
